# Supplementary material
Source: publisher figshare collection journal article supplement (https://gsajournals.figshare.com/articles/dataset/_/7312142)
Supplement: Supplementary file 1 [file 1]

## Sheet: Table S1
Table S1: Physical positions and naming scheme of heterozygous blocks
Chromosome	Start	End	Block_ID
chr01	3635000	3980000	b01
chr01	24257500	25235000	b02
chr01	25862500	26010000	b03
chr01	79590000	85742500	b04
chr02	20670000	27535000	b05
chr02	29707500	34860000	b06
chr02	41730000	45365000	b07
chr03	40810000	61907500	b08
chr05	24572500	24592500	b09
chr05	28325000	28362500	b10
chr05	46630000	47967500	b11
chr05	49170000	49365000	b12
chr06	30000	2515000	b13
chr06	31987500	32060000	b14
chr06	45595000	59532096	b15
chr10	62500	4542500	b16
chr10	44037500	46810000	b17
chr10	57810000	59727500	b18
chr11	6030000	10275000	b19
chr12	3712500	4595000	b20
chr12	20427500	20445000	b21
chr12	44240000	44257500	b22
chr12	45387500	45437500	b23

## Sheet: Table S2
Table S2: Position of QTL, for single QTLs and interacting QTLs
QTL_ID	Chr.	Start	End	Trait	QTL-1 Chr.	QTL-2 Chr.	QTL-1 bin	QTL-2 bin	LD (r2)	LODf	LODfv1	LODi	QTL-1 a pos	QTL-2 a pos	LODa	LODnull
yd1	chr01	69737200	69792590	yd	1	5	69.7649	47.4807	0.060752	13.4881	10.6693	8.20542	67.2885	32.8713	5.28269	2.46392
yd2	chr02	32057409	32160366	yd	2	9	32.1089	56.6387	0.019815	13.343	8.14186	5.94256	32.1089	57.2103	7.40041	2.1993
yd2	chr02	32057409	32160366	yd	2	5	32.1089	33.4827	0.000254972	13.3738	8.17265	5.43614	32.1089	32.8713	7.93761	2.73651
yd2	chr02	32057409	32160366	tw	2	12	32.1089	26.6004	0.00357314	14.0871	9.931	7.03909	0.358375	37.182	7.04803	2.89191
yd2	chr02	32057409	32160366	yd	2	7	32.1089	24.1965	0.00308957	16.0881	10.887	7.61654	32.1089	51.7172	8.47158	3.27047
yd3	chr04	52480630	52756080	yd	4	12	52.6184	52.4295	0.00714993	10.0818	7.07205	2.29414	39.2387	58.4331	7.7877	4.77791
tn1	chr05	3436979	3603744	tn	5	NA	3.52036	NA	NA	4.84	NA	NA	NA	NA	NA	NA
tw1	chr05	9694035	9877748	tw	5	NA	9.78589	NA	NA	3.31	NA	NA	NA	NA	NA	NA
yd4	chr05	31668713	32222614	tn	5	6	31.9457	51.6782	0.000364498	13.5324	8.46145	5.70767	46.8098	49.0132	7.82476	2.75378
yd4	chr05	31668713	32222614	yd	2	5	32.1089	31.9457	0.000254972	13.3738	8.17265	5.43614	32.1089	32.8713	7.93761	2.73651
yd5	chr05	46800011	46819642	tn	5	NA	46.8098	NA	NA	5.07098	NA	NA	NA	NA	NA	NA
yd5	chr05	46800011	46819642	yd	1	5	69.7649	46.8098	0.060752	13.4881	10.6693	8.20542	67.2885	32.8713	5.28269	2.46392
yd6	chr06	51413290	51943133	tn	6	7	51.6782	51.5039	0.00536283	14.8453	10.5676	6.21334	51.6782	2.87139	8.632	4.35423
yd6	chr06	51413290	51943133	tn	6	NA	51.6782	NA	NA	4.27777	NA	NA	NA	NA	NA	NA
yd6	chr06	51413290	51943133	tn	5	6	31.9457	51.6782	0.000364498	13.5324	8.46145	5.70767	46.8098	49.0132	7.82476	2.75378
tn2	chr07	1907809	1910547	tn	7	NA	1.90918	NA	NA	4.11128	NA	NA	NA	NA	NA	NA
yd7	chr07	23913895	24479108	yd	2	7	32.1089	24.1965	0.00308957	16.0881	10.887	7.61654	32.1089	51.7172	8.47158	3.27047
tn3	chr07	51465678	51542063	tn	6	7	51.6782	51.5039	0.00536283	14.8453	10.5676	6.21334	51.6782	2.87139	8.632	4.35423
yd8	chr09	56545220	56732099	yd	2	9	32.1089	56.6387	0.019815	13.343	8.14186	5.94256	32.1089	57.2103	7.40041	2.1993
tw2	chr12	26598691	26602058	tw	2	12	32.1089	26.6004	0.00357314	14.0871	9.931	7.03909	0.358375	37.182	7.04803	2.89191
yd9	chr12	52400568	52458384	tw	12	NA	52.4295	NA	NA	4.15611	NA	NA	NA	NA	NA	NA
yd9	chr12	52400568	52458384	yd	4	12	52.6184	52.4295	0.00714993	10.0818	7.07205	2.29414	39.2387	58.4331	7.7877	4.77791

## Sheet: Table S3
Table S3: SNV effects for genes underlying yield-associated QTLs
Transcript_Id	QTL_ID	variants_effect_3_prime_UTR_variant	variants_effect_5_prime_UTR_premature_start_codon_gain_variant	variants_effect_5_prime_UTR_variant	variants_effect_conservative_inframe_deletion	variants_effect_conservative_inframe_insertion	variants_effect_disruptive_inframe_deletion	variants_effect_disruptive_inframe_insertion	variants_effect_downstream_gene_variant	variants_effect_frameshift_variant	variants_effect_intron_variant	variants_effect_missense_variant	variants_effect_splice_region_variant	variants_effect_stop_gained	variants_effect_stop_lost	variants_effect_synonymous_variant	variants_effect_upstream_gene_variant
PGSC0003DMT400083137	yd6	4	0	2	0	0	0	0	17	0	34	1	2	0	0	6	30
PGSC0003DMT400044325	yd8	0	0	0	0	0	0	0	37	0	21	3	0	0	0	5	67
PGSC0003DMT400079854	tn3	7	0	1	0	0	0	0	51	0	43	4	0	0	0	7	4
PGSC0003DMT400043794	tw1	10	1	1	0	0	0	0	40	0	3	4	1	0	0	3	14
PGSC0003DMT400078533	tn1	8	0	0	0	0	0	0	37	0	51	2	0	0	0	9	51
PGSC0003DMT400083076	yd6	3	0	1	0	0	0	0	82	0	10	3	0	0	0	6	58
PGSC0003DMT400078527	tn1	0	0	0	0	0	0	0	24	0	21	0	1	0	0	3	22
PGSC0003DMT400093266	yd8	0	0	0	0	1	0	0	33	0	0	1	0	0	0	0	40
PGSC0003DMT400044209	yd8	0	0	0	0	0	0	0	0	0	15	0	1	0	0	0	17
PGSC0003DMT400044321	yd8	3	0	0	0	0	0	0	27	0	56	2	0	0	0	4	22
PGSC0003DMT400011287	yd7	0	0	0	0	0	0	0	44	1	0	3	0	0	0	6	51
PGSC0003DMT400019844	tw1	0	0	1	0	0	0	0	37	0	8	1	1	0	0	0	13
PGSC0003DMT400019848	tw1	0	1	5	0	0	0	0	36	0	41	1	0	0	0	2	28
PGSC0003DMT400022446	yd3	0	0	0	0	0	0	0	8	0	0	0	0	0	0	0	0
PGSC0003DMT400022450	yd3	0	0	0	0	0	0	0	18	0	3	0	0	0	0	0	0
PGSC0003DMT400022454	yd3	0	0	0	0	0	0	0	17	0	4	1	0	0	0	0	14
PGSC0003DMT400022458	yd3	0	0	0	0	0	0	0	0	0	35	4	0	0	0	2	11
PGSC0003DMT400022462	yd3	0	0	0	0	0	0	0	6	0	0	1	0	0	0	0	1
PGSC0003DMT400026432	yd2	1	0	3	0	0	0	0	44	0	0	1	0	0	0	2	47
PGSC0003DMT400026508	yd2	13	0	0	0	0	0	0	17	0	0	5	0	0	0	4	35
PGSC0003DMT400026509	yd2	0	0	0	0	0	0	0	47	0	10	6	0	0	0	4	13
PGSC0003DMT400026512	yd2	1	1	1	0	0	0	0	32	0	3	3	0	0	0	6	13
PGSC0003DMT400026515	yd2	1	0	7	1	0	0	0	9	0	8	5	0	0	0	2	74
PGSC0003DMT400026519	yd2	4	1	2	0	0	0	0	78	0	16	0	1	0	0	2	17
PGSC0003DMT400026521	yd2	0	0	0	0	0	0	0	14	0	0	0	0	0	0	2	50
PGSC0003DMT400026524	yd2	3	0	3	0	0	0	0	17	0	28	0	1	0	0	0	42
PGSC0003DMT400026556	yd2	0	0	0	0	0	0	0	12	0	0	0	0	0	0	0	33
PGSC0003DMT400026557	yd2	7	0	0	0	0	0	0	32	0	0	0	0	0	0	1	59
PGSC0003DMT400030308	yd9	4	0	1	0	0	1	0	100	0	0	4	0	0	0	1	93
PGSC0003DMT400030334	yd9	0	0	0	0	0	0	0	101	0	0	1	0	0	0	2	59
PGSC0003DMT400033298	yd3	0	0	0	0	0	0	0	38	0	0	1	1	0	1	0	25
PGSC0003DMT400033315	yd3	1	0	0	1	0	0	0	30	0	0	0	1	0	1	3	25
PGSC0003DMT400038804	yd4	0	0	0	0	0	0	0	1	0	6	0	0	0	0	0	2
PGSC0003DMT400043791	tw1	0	1	5	0	0	0	0	17	0	0	9	0	0	0	5	21
PGSC0003DMT400044203	yd8	0	0	0	0	0	0	0	3	0	0	0	0	0	0	0	7
PGSC0003DMT400044210	yd8	0	0	0	0	0	0	0	0	0	0	0	0	0	0	0	14
PGSC0003DMT400044211	yd8	1	0	0	0	0	0	0	10	0	2	0	0	0	0	1	0
PGSC0003DMT400044318	yd8	0	0	2	0	0	0	0	7	0	0	0	0	0	0	0	36
PGSC0003DMT400044328	yd8	1	0	2	0	0	0	0	61	0	11	2	0	0	0	7	13
PGSC0003DMT400044334	yd8	0	0	0	0	0	0	0	1	0	0	0	0	0	0	0	0
PGSC0003DMT400044335	yd8	0	0	0	0	0	0	0	7	0	12	1	0	0	0	1	27
PGSC0003DMT400044337	yd8	0	0	0	0	0	0	0	21	0	0	2	0	0	0	3	30
PGSC0003DMT400044348	yd8	1	0	0	0	0	0	0	8	0	0	0	0	0	0	0	0
PGSC0003DMT400056815	yd7	1	0	0	0	0	0	0	22	0	0	4	0	0	0	0	25
PGSC0003DMT400056816	yd7	0	0	0	0	0	0	0	2	0	0	0	0	0	0	0	2
PGSC0003DMT400056817	yd7	0	0	0	0	0	0	0	2	0	0	0	0	0	0	0	2
PGSC0003DMT400056818	yd7	0	0	1	0	0	0	0	0	0	0	0	0	0	0	0	1
PGSC0003DMT400056819	yd7	0	0	0	0	0	0	0	2	0	0	0	0	0	0	0	0
PGSC0003DMT400066978	yd1	1	0	1	0	0	0	0	41	0	24	3	0	0	0	3	27
PGSC0003DMT400066981	yd1	0	0	1	0	0	0	0	19	0	10	0	0	0	0	1	21
PGSC0003DMT400066984	yd1	4	0	0	0	0	0	0	9	0	0	0	0	0	0	1	0
PGSC0003DMT400070611	tn2	8	0	0	0	0	0	0	29	0	5	1	0	0	0	0	0
PGSC0003DMT400078409	tn1	7	0	4	0	0	0	0	15	0	9	3	0	0	0	2	28
PGSC0003DMT400078414	tn1	3	0	1	0	0	0	0	60	0	6	0	0	0	0	4	31
PGSC0003DMT400078418	tn1	2	2	2	0	0	0	0	35	0	27	1	2	0	0	7	27
PGSC0003DMT400078423	tn1	0	0	0	0	1	0	0	1	0	13	3	0	0	0	6	18
PGSC0003DMT400078539	tn1	0	0	0	0	0	0	0	6	0	9	2	1	0	0	2	41
PGSC0003DMT400078542	tn1	4	0	1	0	0	0	0	35	0	1	2	1	0	0	2	23
PGSC0003DMT400078544	tn1	0	0	0	0	0	0	0	22	0	2	1	0	0	0	0	40
PGSC0003DMT400078545	tn1	0	0	0	0	0	0	0	33	0	0	0	0	0	0	0	30
PGSC0003DMT400078547	tn1	1	0	0	0	0	0	0	24	0	0	0	0	0	0	0	0
PGSC0003DMT400078572	tn1	0	0	1	0	0	0	0	69	0	0	0	0	1	0	0	47
PGSC0003DMT400078573	tn1	2	0	0	0	0	0	0	60	0	0	1	0	0	0	0	78
PGSC0003DMT400078574	tn1	0	0	0	0	0	0	0	1	0	0	1	0	0	0	0	44
PGSC0003DMT400079826	tn3	3	1	4	0	0	0	0	5	0	17	1	0	0	0	0	16
PGSC0003DMT400079829	tn3	0	0	0	0	0	0	0	40	0	0	2	0	0	0	0	1
PGSC0003DMT400079832	tn3	4	0	3	0	0	0	0	42	0	11	2	1	0	0	2	56
PGSC0003DMT400079845	tn3	1	0	0	0	0	0	0	16	0	0	0	0	0	0	0	12
PGSC0003DMT400079848	tn3	0	0	0	0	0	0	0	36	0	16	2	1	0	0	5	43
PGSC0003DMT400079851	tn3	2	0	0	0	0	0	0	30	0	0	2	0	0	0	4	56
PGSC0003DMT400079865	tn3	1	0	0	0	0	0	0	23	0	0	3	0	0	0	0	40
PGSC0003DMT400079866	tn3	0	0	0	0	0	0	0	14	0	0	1	0	0	0	0	14
PGSC0003DMT400083041	yd6	4	0	1	0	0	0	0	24	0	33	0	4	0	0	3	27
PGSC0003DMT400083045	yd6	6	0	2	0	0	0	0	49	0	16	1	1	0	0	2	36
PGSC0003DMT400083063	yd6	0	0	0	0	0	0	0	26	0	0	0	0	0	0	0	29
PGSC0003DMT400083065	yd6	8	0	0	0	0	0	0	48	0	60	1	3	0	0	1	44
PGSC0003DMT400083067	yd6	1	0	1	0	0	0	0	58	0	63	0	1	0	0	0	23
PGSC0003DMT400083070	yd6	4	0	0	0	0	0	0	44	0	9	1	2	0	0	0	45
PGSC0003DMT400083071	yd6	4	0	0	0	0	0	0	112	0	30	7	1	0	0	5	39
PGSC0003DMT400083077	yd6	1	0	2	0	0	0	0	37	0	1	0	0	0	0	1	44
PGSC0003DMT400083079	yd6	2	0	0	0	0	0	0	55	0	2	1	0	0	0	4	39
PGSC0003DMT400083080	yd6	2	0	1	0	0	0	0	70	0	7	2	1	0	0	2	61
PGSC0003DMT400083083	yd6	2	0	1	0	0	0	0	66	0	0	2	0	0	0	7	48
PGSC0003DMT400083086	yd6	4	1	8	0	0	0	0	32	0	34	9	1	0	0	4	51
PGSC0003DMT400083089	yd6	9	0	0	0	0	0	0	39	0	2	8	0	0	0	4	42
PGSC0003DMT400083090	yd6	2	0	0	0	0	0	0	11	0	7	0	0	0	0	1	40
PGSC0003DMT400083091	yd6	1	0	5	0	0	0	0	51	0	10	5	0	0	0	9	21
PGSC0003DMT400083092	yd6	6	0	0	0	0	0	0	47	0	1	11	0	0	0	7	35
PGSC0003DMT400083093	yd6	2	1	4	0	0	0	0	20	0	24	2	1	0	0	2	34
PGSC0003DMT400083133	yd6	0	0	2	1	0	0	0	39	0	3	0	0	0	0	0	16
PGSC0003DMT400083135	yd6	12	0	0	0	0	0	0	29	0	2	0	0	0	0	7	48
PGSC0003DMT400083136	yd6	7	1	2	0	0	0	0	32	0	22	5	0	0	0	6	16
PGSC0003DMT400083142	yd6	7	0	4	0	0	0	0	41	0	28	6	0	0	0	7	65
PGSC0003DMT400083144	yd6	0	1	1	0	0	0	0	64	0	5	1	0	0	0	0	93
PGSC0003DMT400083147	yd6	3	0	1	0	0	0	0	50	1	23	6	1	0	0	8	32
PGSC0003DMT400083148	yd6	3	0	0	0	0	1	1	43	0	3	3	0	0	0	8	64
PGSC0003DMT400083149	yd6	1	0	0	0	0	0	0	58	0	63	1	5	0	0	3	45
PGSC0003DMT400083150	yd6	6	0	2	0	0	0	0	71	0	12	1	0	0	0	2	60
PGSC0003DMT400083152	yd6	2	0	6	0	0	0	0	64	0	15	13	2	0	0	7	11
PGSC0003DMT400083155	yd6	4	0	0	0	0	0	0	61	0	26	2	0	0	0	2	28
PGSC0003DMT400083157	yd6	0	3	9	0	0	0	0	54	0	0	2	0	0	0	2	57
PGSC0003DMT400083158	yd6	3	0	1	0	0	0	0	55	0	2	1	0	0	0	3	41
PGSC0003DMT400083161	yd6	23	0	6	0	0	0	0	52	0	5	12	0	0	0	3	46
PGSC0003DMT400083163	yd6	6	0	0	0	0	0	0	31	0	13	0	0	0	0	3	56
PGSC0003DMT400083164	yd6	0	0	2	0	1	0	0	40	0	10	11	0	0	0	0	29
PGSC0003DMT400083166	yd6	2	0	2	0	0	0	0	29	0	23	3	1	0	0	0	42
PGSC0003DMT400083177	yd6	0	0	0	0	0	0	0	38	0	0	2	0	0	0	0	14
PGSC0003DMT400083179	yd6	0	0	1	0	0	0	0	27	0	0	2	0	0	0	2	28
PGSC0003DMT400083180	yd6	1	0	1	0	0	0	0	28	0	0	2	0	0	0	4	37
PGSC0003DMT400083182	yd6	0	0	1	0	0	0	0	41	0	0	7	0	0	0	3	71
PGSC0003DMT400083183	yd6	6	0	1	0	0	0	0	44	0	0	0	0	0	0	0	71
PGSC0003DMT400083184	yd6	0	0	0	0	0	0	0	0	0	0	0	0	0	0	0	32
PGSC0003DMT400083923	yd4	3	0	0	0	0	0	0	16	0	30	2	0	0	0	4	38
PGSC0003DMT400083928	yd4	0	1	3	0	0	0	0	15	0	0	2	0	0	0	5	31
PGSC0003DMT400086755	tn1	0	0	0	0	0	0	0	24	0	0	1	0	0	0	1	67
PGSC0003DMT400087118	yd3	0	0	0	0	0	0	0	0	0	0	0	0	0	0	0	1
PGSC0003DMT400087693	yd7	0	0	0	0	0	0	0	4	0	0	0	0	0	0	0	1
PGSC0003DMT400089172	yd3	0	0	0	0	0	0	0	23	0	0	0	0	0	0	0	23
PGSC0003DMT400089644	yd7	0	0	0	0	0	0	0	23	0	21	0	0	0	0	0	0
PGSC0003DMT400090352	yd3	0	0	0	0	0	0	0	0	0	0	0	0	0	0	0	8
PGSC0003DMT400090701	yd7	0	0	0	0	0	0	0	12	0	0	0	0	0	0	0	0
PGSC0003DMT400090750	yd4	0	0	0	0	0	0	0	1	0	0	0	0	0	0	0	1
PGSC0003DMT400091483	yd7	0	0	0	0	0	0	0	5	0	0	0	0	0	0	0	1
PGSC0003DMT400092332	tn3	0	0	0	0	0	0	0	9	0	0	0	0	0	0	0	25
PGSC0003DMT400092598	yd4	0	0	0	0	0	0	0	1	0	2	0	0	0	0	0	0
PGSC0003DMT400092659	yd4	0	0	0	0	0	0	0	0	0	0	0	0	0	0	0	1
PGSC0003DMT400093649	yd9	0	0	0	0	0	0	0	117	1	0	5	0	0	0	4	1
PGSC0003DMT400093861	yd3	0	0	0	0	0	0	0	0	0	0	0	0	0	0	0	5
PGSC0003DMT400094320	yd7	0	0	0	0	0	0	0	1	0	0	0	0	0	0	0	3
PGSC0003DMT400094399	yd4	0	0	0	0	0	0	0	2	0	1	0	0	0	0	0	2
PGSC0003DMT400094886	yd9	0	0	0	0	0	0	0	46	0	0	9	0	0	0	2	25
PGSC0003DMT400095466	yd8	0	0	0	0	0	0	0	31	0	0	3	0	0	0	2	16
PGSC0003DMT400096121	yd7	0	0	0	0	0	0	0	34	0	53	3	1	0	1	2	19
PGSC0003DMT400096206	yd3	0	0	0	0	0	0	0	18	0	0	1	0	0	0	0	34
PGSC0003DMT400097114	yd7	0	0	0	0	0	0	0	3	0	0	0	0	0	0	0	0
PGSC0003DMT400038808	yd4	0	0	0	0	0	0	0	2	0	0	0	0	0	0	0	0
PGSC0003DMT400054287	yd7	0	0	0	0	0	0	0	1	0	5	0	0	0	0	0	0
PGSC0003DMT400077397	yd5	1	0	0	0	0	0	0	1	0	4	0	0	0	0	0	20
PGSC0003DMT400078420	tn1	0	0	2	0	0	0	0	4	0	10	3	1	0	0	1	10
PGSC0003DMT400083052	yd6	12	0	2	1	0	0	0	40	0	0	4	0	1	0	0	45
PGSC0003DMT400038810	yd4	0	0	0	0	0	0	0	0	0	0	0	0	0	0	0	2
PGSC0003DMT400054288	yd7	0	0	0	0	0	0	0	0	0	0	1	0	0	0	0	5
PGSC0003DMT400078422	tn1	0	0	0	0	0	0	0	23	0	0	0	0	0	0	0	11
PGSC0003DMT400078535	tn1	0	0	2	0	0	0	0	51	0	33	6	0	0	0	7	28
PGSC0003DMT400083058	yd6	0	0	1	0	0	0	0	26	0	38	8	0	0	0	4	55
PGSC0003DMT400077403	yd5	1	0	0	0	0	0	0	21	0	3	1	0	0	0	0	7
PGSC0003DMT400044207	yd8	7	0	0	0	0	0	0	32	0	67	1	2	0	0	2	8
PGSC0003DMT400019845	tw1	2	0	1	0	0	1	0	30	0	99	11	11	0	0	22	40
PGSC0003DMT400056814	yd7	0	0	0	0	0	0	0	35	0	7	9	0	0	0	9	21
snoR114	yd8	0	0	0	0	0	0	0	0	0	0	0	0	0	0	0	1
snoR44_J54	yd6	0	0	0	0	0	0	0	72	0	0	0	0	0	0	0	56
snoR71	yd7	0	0	0	0	0	0	0	1	0	0	0	0	0	0	0	4
snoZ267	yd6	0	0	0	0	0	0	0	62	0	0	0	0	0	0	0	53

## Sheet: Table S4
Table S4: TPM values across various tissues for genes at different QTL
QTL_ID	transcript_id	chr	start	stop	Stamen	Water_Stressed_Leaf	Tuber_Pith	Tuber_Peel	Whole_in_vitro_Plant	Tuber_Sprout	Tuber_Cortex	Flower	Leaf	Petiole	Shoot_Apex	Stem	Stolon	Young_Tuber	Mature_Tuber	Root
yd1	PGSC0003DMT400066980	chr01	69766023	69772325	25.676	38.5604	31.9125	26.3872	57.9133	82.0381	39.6874	35.698	17.9602	60.9467	14.0701	32.1469	42.852	16.1124	19.1558	65.0414
yd2	PGSC0003DMT400026509	chr02	32062536	32065323	1.36657	17.0604	1.47497	0.885489	3.19471	3.94473	1.07744	9.30082	7.15368	7.33735	2.66097	5.30018	5.69684	2.341	2.34222	5.50484
yd2	PGSC0003DMT400026556	chr02	32065558	32066005	0	9.16377	0	0	3.12001	3.02697	0	0.942615	3.57445	7.8814	0.951743	2.84612	2.03942	0	0	4.22411
yd2	PGSC0003DMT400026512	chr02	32066123	32071494	4.86097	48.8248	63.4855	42.2231	49.6705	58.4601	71.2417	17.3683	33.5946	48.8297	37.134	34.6215	56.6948	39.8587	34.0008	54.0136
yd2	PGSC0003DMT400026515	chr02	32074427	32080205	36.6595	6.11733	36.8756	42.957	14.3674	69.5114	49.381	273.384	79.7044	33.8793	103.174	35.5134	202.57	65.702	127.497	22.0033
yd2	PGSC0003DMT400026519	chr02	32084539	32089547	15.1493	39.9618	15.0176	12.9164	28.9126	22.0003	17.0456	17.9377	29.0497	27.0794	22.0727	22.9425	31.128	18.5159	13.3003	14.2342
yd2	PGSC0003DMT400026524	chr02	32131779	32135312	14.3547	24.2835	16.5812	15.6978	34.3869	44.7251	13.6254	12.4894	8.18051	14.1346	21.323	16.9126	33.1632	23.8014	13.3862	36.0233
yd2	PGSC0003DMT400026432	chr02	32147633	32149064	29.7825	17.1517	23.6908	12.7057	23.7905	34.0936	23.0104	24.2403	8.01738	15.712	14.42	12.8612	27.4425	11.46	12.7491	26.2728
yd3	PGSC0003DMT400022458	chr04	52488902	52498446	0.82234	13.6433	3.83986	3.36457	12.0966	18.3927	5.02472	2.82258	6.92913	11.4366	5.30831	19.746	12.2071	10.3857	4.70655	11.3203
yd3	PGSC0003DMT400022454	chr04	52520464	52522435	130.143	76.7229	1447.7	702.46	470.197	395.352	1113.3	198.877	134.671	422.313	487.665	886.437	583.959	758.008	600.402	636.588
yd3	PGSC0003DMT400022450	chr04	52558197	52564365	24.2847	42.9566	71.0719	52.2392	60.6067	87.6269	61.0817	25.3646	20.6298	31.0858	33.6759	24.7161	46.0323	32.6006	30.2756	58.9534
tn1	PGSC0003DMT400078547	chr05	3430983	3438165	75.333	47.6965	11.7956	10.5707	63.4237	31.0179	14.4394	56.7003	39.0065	30.8831	9.3727	31.6898	25.6478	17.5708	11.0224	26.477
tn1	PGSC0003DMT400078423	chr05	3438946	3442612	0.317082	0.147696	0	0	16.2928	0.0731804	0	0.957128	0	0	0	0	0	0	0	0
tn1	PGSC0003DMT400078545	chr05	3446146	3452767	5.84528	12.2972	64.93	34.2142	48.8622	86.5078	59.4395	22.0182	16.1296	44.1651	67.1996	42.0547	33.5632	45.0599	71.7992	84.5419
tn1	PGSC0003DMT400078574	chr05	3453698	3454490	0	0	0.411243	0.790036	86.4813	292.035	3.83453	0.391425	21.5225	62.5466	39.9168	43.7292	86.3815	30.2108	10.0133	104.543
tn1	PGSC0003DMT400078544	chr05	3460046	3462072	1.04482	0.307973	0.599094	0.863187	2.35927	4.27265	1.0474	2.28089	2.70291	1.58926	1.72724	2.29564	7.40234	3.26006	0.634229	1.27767
tn1	PGSC0003DMT400078420	chr05	3469586	3474016	6.14274	10.2401	10.9277	7.06721	12.9209	9.14861	13.4988	5.13548	12.6877	6.0019	6.23318	8.92773	11.6167	4.40278	9.08735	10.1982
tn1	PGSC0003DMT400078542	chr05	3482472	3485301	1.52274	5.08692	25.4179	17.9385	20.0194	22.9808	36.5228	6.64845	6.653	6.43392	49.5072	13.3828	33.0641	35.3706	37.2816	16.1381
tn1	PGSC0003DMT400078539	chr05	3505156	3508206	0	0	0	0	0	1.12775	0.258027	0.421425	0	0	23.8284	2.12075	1.36768	5.22026	0.937455	1.51081
tn1	PGSC0003DMT400078418	chr05	3520238	3523456	6.45799	162.438	7.05379	12.534	45.9237	18.5642	4.38446	24.8396	13.7895	45.5295	5.64868	21.8475	22.0301	5.11985	3.98237	39.5111
tn1	PGSC0003DMT400078537	chr05	3528457	3533541	6.25718	110.564	15.4039	19.1155	53.9545	26.514	14.0506	43.8934	40.7483	101.86	10.1142	39.0448	49.4538	14.0577	11.1415	116.06
tn1	PGSC0003DMT400078534	chr05	3536537	3543424	1.92494	14.111	8.15816	5.07055	14.2116	14.2768	12.529	5.11578	8.14082	12.9002	25.0887	17.6533	21.3461	19.3244	10.7704	10.3982
tn1	PGSC0003DMT400078573	chr05	3540835	3541246	0	1.86468	4.64296	0.557473	2.85692	7.10905	7.45775	2.48581	0	2.30938	1.1155	5.62923	2.68912	1.05272	0.614407	6.44653
tn1	PGSC0003DMT400078572	chr05	3542381	3542694	0	4.39087	1.06769	3.07668	0	3.26339	2.79994	2.03247	1.92682	1.88821	2.05215	0	0	3.87331	0	6.37563
tn1	PGSC0003DMT400078414	chr05	3546250	3549026	1.96924	2.66476	5.23929	5.46678	6.40324	6.67255	5.26482	4.81485	2.28229	5.99104	3.99336	5.1351	3.53444	6.99149	5.29234	5.4715
tn1	PGSC0003DMT400078527	chr05	3582667	3587942	1.25299	4.0099	4.58444	2.69473	8.62273	19.5198	4.94457	12.6347	25.4376	10.7698	34.8517	15.6006	35.7905	40.5854	13.9079	4.61127
tn1	PGSC0003DMT400078409	chr05	3590596	3594679	3.8762	9.71174	23.3373	19.0363	11.6703	29.0606	22.8828	8.46196	7.35357	4.91334	8.54391	6.74236	17.1639	8.73497	16.8628	17.5381
tw1	PGSC0003DMT400043791	chr05	9700092	9701326	1.36205	1.59056	3.61339	4.26712	6.09791	8.28233	7.26045	2.84867	3.67756	5.26345	11.1761	8.82777	10.6208	10.2397	3.8169	6.3034
tw1	PGSC0003DMT400019844	chr05	9804390	9805958	702.1	0	0	0	0	0	0	349.361	0.399518	0.391514	0	0	0	0	0	4.7213
tw1	PGSC0003DMT400019845	chr05	9823450	9838970	70.1292	188.339	273.202	150.33	49.4653	148.24	319.104	56.2696	43.8692	77.6326	94.7072	41.4474	42.8339	75.7324	174.769	132.605
tw1	PGSC0003DMT400019848	chr05	9858132	9863611	4.94227	0.554969	0.404839	0.129622	5.20798	3.09387	0.865064	4.49552	5.23668	4.05712	0.648436	5.43028	13.0615	6.24181	0.14286	6.90708
yd4	PGSC0003DMT400038808	chr05	32104515	32108115	0.490213	0.809179	0	0.337495	8.85548	8.01865	0.232971	2.78242	53.9731	17.1009	0.216106	180.375	92.8466	6.52781	0	0.0959138
yd4	PGSC0003DMT400038810	chr05	32109916	32113622	16.693	0	0	0.0544027	0.356865	0.230816	0.0440083	33.6388	2.45771	0.60098	0.217719	7.45138	3.96918	0.102733	0	0
yd5	PGSC0003DMT400077403	chr05	46809323	46811750	0.396953	2.57415	3.64177	4.15399	3.22684	4.63796	2.65288	2.59971	1.23229	4.83038	3.06237	2.18043	12.6555	3.71573	3.37344	0.970833
yd6	PGSC0003DMT400083166	chr06	51450050	51455890	54.99	30.3343	9.42631	10.0504	24.3517	17.9593	15.3813	69.2644	20.0734	33.0076	21.3791	13.9069	19.2177	13.5076	21.7546	20.4248
yd6	PGSC0003DMT400083093	chr06	51456001	51461757	2.52768	7.83707	5.42181	3.4031	11.5846	6.45366	5.56835	6.84648	7.26558	8.06935	6.19055	9.15338	12.7125	9.93189	5.79646	5.17465
yd6	PGSC0003DMT400083092	chr06	51479402	51481512	111.359	0	0	0	0	0	0	70.2809	0.121362	0	0	0	0	0	0	0.745777
yd6	PGSC0003DMT400083091	chr06	51483151	51488343	1.15676	3.91579	4.15087	3.7406	9.36982	6.62697	3.99009	4.56217	5.63751	5.44888	4.19472	5.65713	7.84296	4.65723	6.16143	8.1041
yd6	PGSC0003DMT400083090	chr06	51498150	51499466	7.55628	0	17.6298	8.89763	77.1934	159.22	86.0231	8.53229	0.539251	48.6171	15.5069	54.9597	41.8432	82.3847	65.7973	14.2746
yd6	PGSC0003DMT400083086	chr06	51538784	51545828	16.7322	35.8609	7.1732	6.80413	15.1836	15.4388	7.83806	12.8018	4.61174	17.9981	4.48088	7.38705	8.5864	5.52982	5.03095	19.5432
yd6	PGSC0003DMT400083083	chr06	51556779	51558723	1.20536	3.76242	0.0813114	0.234311	12.5522	1.24264	0.0947712	5.57231	0.586959	2.3008	0	0.778935	0	0.294979	0	1.87282
yd6	PGSC0003DMT400083158	chr06	51580861	51582072	0.13207	2.49147	0.151457	2.76414	149.589	0	0	7.49622	643.962	37.2314	0.291109	209.8	171.855	0	0	0.129202
yd6	PGSC0003DMT400083080	chr06	51598496	51601151	25.5194	38.7044	21.5398	18.1744	99.2118	35.9532	24.1133	67.1761	75.8537	102.354	7.67611	65.7288	47.9974	7.95663	24.2585	37.1406
yd6	PGSC0003DMT400083079	chr06	51607584	51609977	11.942	137.216	140.18	86.8704	113.155	162.169	134.321	39.3509	52.6938	93.2229	86.9139	42.5758	93.9187	84.3658	83.4326	177.004
yd6	PGSC0003DMT400083155	chr06	51613727	51618402	6.8253	32.5906	6.45756	6.2964	18.6477	16.8457	9.80667	9.87087	12.5359	22.6665	8.086	18.5573	23.17	9.583	14.5004	19.2794
yd6	PGSC0003DMT400083077	chr06	51619909	51620771	0	0	0	0.154141	6.06669	7.19374	0	12.8376	35.9101	1.70278	0.616871	5.53414	233.967	15.7182	0	0
yd6	PGSC0003DMT400083153	chr06	51665856	51668973	12.7951	10.5068	39.8275	24.6652	29.924	40.4443	40.1596	23.1938	17.496	29.4252	32.4837	23.5955	46.4045	29.2297	34.6743	46.7162
yd6	PGSC0003DMT400083076	chr06	51677473	51679814	1.18472	1.39812	0	0.307063	5.66505	3.82694	0	6.23754	5.04793	3.53343	0.307217	4.90104	8.55805	3.47912	0.169211	0
yd6	PGSC0003DMT400083184	chr06	51689868	51690535	0.631947	0	2.13065	4.10061	3.15729	2.43026	4.1584	3.67886	1.30786	1.38419	12.0577	2.72144	5.90994	5.52585	9.49449	2.03484
yd6	PGSC0003DMT400083150	chr06	51703537	51705496	32.7996	184.225	567.522	374.803	228.214	291.843	659.298	133.765	147.325	194.081	481.847	254.609	423.05	470.473	590.74	159.027
yd6	PGSC0003DMT400083183	chr06	51710650	51711099	0.42829	0.504975	0	0	0.773687	0	0	18.6996	0	0	0	0	1.01145	0	0	0
yd6	PGSC0003DMT400083182	chr06	51712260	51714053	0.0664916	3.05799	0	0.0732435	16.9362	0.0776881	0	24.8215	13.7613	1.34853	0	0.292187	1.72729	1.24481	0	1.69189
yd6	PGSC0003DMT400083149	chr06	51719719	51725016	1.12408	48.0069	35.8077	35.0831	44.4474	56.6203	48.0788	17.9954	14.4763	48.1281	57.8127	22.5025	53.6823	68.3285	56.4067	38.7328
yd6	PGSC0003DMT400083148	chr06	51736928	51738990	0.0634221	1.27123	0.581855	0.139725	11.5715	5.33533	0.932485	2.0768	2.62514	9.77564	1.95712	10.7299	17.3742	16.359	3.54187	7.13517
yd6	PGSC0003DMT400083071	chr06	51759442	51766133	632.926	7.9785	0.155984	0.449491	5.28278	1.86733	0.272707	368.422	1.19637	2.48273	0.224858	0.747137	2.56977	0.565873	0.247698	6.05444
yd6	PGSC0003DMT400083147	chr06	51766422	51771503	670.654	0.0411241	0	0	0.0630074	0	0	397.846	0.288739	0.212215	0	0	0.0823703	0	0	4.29934
yd6	PGSC0003DMT400083070	chr06	51771795	51772886	1.11945	0.989914	2.88849	0	2.02224	1.96192	1.12221	9.77527	0.579195	2.27036	1.23374	3.07452	5.94831	0.582153	2.0386	0.273785
yd6	PGSC0003DMT400083144	chr06	51786050	51786631	5.21479	9.66192	1.70866	2.46185	5.38302	0	0.995743	9.75786	0	1.51087	0	1.63683	3.51864	0	0	1.45759
yd6	PGSC0003DMT400083142	chr06	51794723	51797894	0.143248	0.0844477	3.12121	1.34124	1.16446	3.26368	6.12734	0.48862	1.33407	2.75995	87.6192	24.5498	12.3477	17.5804	16.174	2.52246
yd6	PGSC0003DMT400083067	chr06	51799495	51805149	450.561	1547.02	1834.09	1447.63	3244.66	2810.63	1704.49	809.694	839.587	2329.81	317.969	1135.05	892.95	418.769	746.458	2486.91
yd6	PGSC0003DMT400083137	chr06	51835998	51843555	39.95	54.7338	63.8971	41.2847	38.4753	56.8513	81.8666	44.3129	9.37602	18.973	58.6186	17.7105	33.9033	59.9703	98.2879	17.4979
yd6	PGSC0003DMT400083136	chr06	51848030	51851992	7.38344	15.3625	14.6577	12.3707	22.6408	22.4731	18.0791	11.1068	15.4089	20.3854	24.0699	16.359	25.9353	27.4907	18.3797	14.9925
yd6	PGSC0003DMT400083135	chr06	51852543	51855646	72.0635	1.73494e-08	0.219766	0.264489	1.55703	0.0673898	0.140333	51.3334	1.48852	0.520005	1.10618e-07	0.815386	1.73284	0.144542	2.64931e-07	0.192825
yd6	PGSC0003DMT400083065	chr06	51852927	51862776	4.23305	1.67164	0.647918	0.696507	8.12127	1.599	0.80564	8.28071	6.84983	2.79964	0.968904	4.49344	12.9344	0.865859	0.352833	0.867345
yd6	PGSC0003DMT400083063	chr06	51874727	51876278	24.0748	8.13653	1.1691	1.20936	20.6825	0.641373	0.943357	7.36237	50.7984	10.4969	5.01271	18.9531	17.4084	3.10162	15.8047	1.07404
yd6	PGSC0003DMT400083058	chr06	51898114	51905428	14.9062	16.0266	12.1241	6.29307	14.8278	15.4215	13.6045	13.1884	8.28994	15.8482	7.52653	9.95528	16.4382	9.15185	7.97216	17.0879
yd6	PGSC0003DMT400083045	chr06	51906278	51909032	19.6367	104.301	60.1616	41.671	99.463	49.4857	62.272	47.9114	104.786	271.75	16.3372	106.171	46.8288	26.0305	35.7598	92.9441
yd6	PGSC0003DMT400083180	chr06	51913495	51914590	0.236927	5.16892	3.39632	3.26233	38.0918	8.58152	3.16682	0.775837	12.994	11.7739	5.22578	5.72626	6.15481	9.11758	3.73932	10.4305
yd6	PGSC0003DMT400083179	chr06	51919133	51920084	0.706195	53.622	1.61971	2.95605	26.2803	9.40627	2.64297	12.6416	41.5073	26.6404	4.67534	17.068	15.3432	13.2208	1.37177	5.11237
yd6	PGSC0003DMT400083177	chr06	51922029	51922596	2.31864	4.44953	0.332374	0.638522	13.0946	8.46586	4.271	1.97724	7.21151	25.2792	1.27769	9.55208	5.47571	4.8231	0	4.25305
yd6	PGSC0003DMT400083133	chr06	51922693	51924057	0.848829	1.48882	1.76987	0.347736	9.63109	11.311	4.31322	1.22515	7.26217	23.0493	2.47404	18.1878	9.27747	5.83698	3.07665	6.04006
yd6	PGSC0003DMT400083041	chr06	51924963	51932852	193.235	404.308	245.931	194.29	233.25	248.362	259.341	358.136	217.363	238.814	225.164	257.269	247.409	399.687	158.242	236.565
tn2	PGSC0003DMT400070611	chr07	1904072	1908241	23.9835	45.5952	11.3001	7.16795	35.9364	7.60291	13.1707	21.1053	89.2674	20.3615	16.392	16.7484	35.1253	8.89498	7.67428	10.3673
yd7	PGSC0003DMT400056814	chr07	24186132	24190119	0	0.344366	5.15814	3.66772	4.00986	4.29978	4.84081	1.27521	1.4507	2.96176	9.27045	3.85037	7.44936	7.77663	4.96422	6.17174
yd7	PGSC0003DMT400056815	chr07	24226671	24227314	0	0.282832	0.550189	3.43513	0.866671	3.08303	0.961894	0.523675	0.992906	0.973013	6.34496	15.2847	0.566505	2.49495	0	16.1924
yd7	PGSC0003DMT400011287	chr07	24326771	24328091	1.04085	0	0	0	0	0	0	12.6005	0.195828	0	0	0	0	0	0	0
tn3	PGSC0003DMT400079826	chr07	51466771	51472975	25.3303	16.5707	10.495	10.3209	15.6463	15.4025	14.8535	27.3514	12.8521	30.0502	5.40319	28.7252	8.36195	6.11891	10.8459	14.1754
tn3	PGSC0003DMT400079866	chr07	51495374	51495939	0.582853	10.3112	0	0.963061	0	0	0	0	0.603128	1.77313	0	0	0	0	0	0
tn3	PGSC0003DMT400079846	chr07	51496026	51503844	15.4217	43.384	45.7653	25.78	49.1193	43.308	48.2781	27.4649	29.1175	44.172	60.8289	34.4787	43.1296	60.5012	37.4455	37.1881
tn3	PGSC0003DMT400079848	chr07	51507245	51516280	0.161066	0.303847	0.664952	0.74517	0.814683	1.58078	1.98062	0.562585	0.80001	0.783982	53.2531	5.52067	10.2701	11.5254	5.70981	0.882384
tn3	PGSC0003DMT400079851	chr07	51517839	51520335	40.7196	32.4057	27.3413	24.7386	64.3946	55.6046	32.2986	73.4904	57.6449	93.7136	94.6331	97.0671	77.8675	141.779	40.8697	30.2713
tn3	PGSC0003DMT400079832	chr07	51525373	51527164	3.90809	35.4326	0	0.593785	38.2202	15.9028	0.180125	35.3031	49.3651	6.28617	0.594083	5.3297	37.2357	10.6523	0.327214	0
tn3	PGSC0003DMT400079854	chr07	51527963	51537202	20.5536	45.3665	57.605	39.2011	67.8063	83.3496	59.502	38.7737	29.1646	53.7362	38.6482	42.3062	76.145	46.4019	45.1758	76.0777
yd8	PGSC0003DMT400044336	chr09	56582212	56591540	13.9885	20.8038	37.8564	22.6174	43.0253	50.5179	38.5987	19.0861	17.6005	30.036	19.5628	26.0201	35.4754	26.563	22.8365	44.8124
yd8	PGSC0003DMT400044211	chr09	56592630	56595782	6.49466	0	0	0	0	0	0	5.1805	0	0	0	0	0	0	0	0
yd8	PGSC0003DMT400044334	chr09	56607434	56614201	0.0762986	2.18912	3.96665	2.14318	0.68915	6.5077	3.4674	1.83319	0.236858	1.31651	1.93404	0.335282	5.22543	3.22737	2.53198	1.15695
yd8	PGSC0003DMT400044333	chr09	56622581	56624513	0	0.423528	1.44179	1.7806	19.1425	17.8373	1.68046	1.17627	2.23025	14.5704	0.395887	3.15699	0	1.12082	0.872199	8.6096
yd8	PGSC0003DMT400044329	chr09	56625973	56627491	4.27714	0	0	0	0	0	0	16.807	0	0	0	0	0	0	0	0
yd8	PGSC0003DMT400044210	chr09	56627990	56632374	0.253255	0.0426571	0.37341	0.398531	0.653562	1.1836	0.822841	0.473887	0.524128	0.366877	14.195	3.81561	8.62953	4.96703	3.16248	0.38933
yd8	PGSC0003DMT400044209	chr09	56633866	56638761	45.0384	208.019	11.4777	13.4606	105.747	17.1329	15.2443	75.71	280.113	71.7526	21.2912	60.8574	53.3188	14.525	11.3031	25.9581
yd8	PGSC0003DMT400044328	chr09	56642990	56647729	0.910083	1.67393	3.17277	2.1253	4.66902	7.86866	4.76844	4.21193	2.63687	3.17468	19.9798	10.238	22.8681	19.234	7.07125	4.84335
yd8	PGSC0003DMT400044325	chr09	56655299	56661197	13.6239	0.394534	35.4137	28.119	17.4436	33.6233	50.6684	56.0395	4.74873	0.387799	25.1827	0.630187	17.4984	30.726	38.3032	23.1019
yd8	PGSC0003DMT400044207	chr09	56661753	56671464	11.2206	0.951769	0.231432	0.533523	46.955	2.97096	7.06723	9.69231	1.00238	12.7699	4.80412	12.5928	0.667228	1.76312	6.07612	61.7156
yd8	PGSC0003DMT400044321	chr09	56698730	56705382	9.9388	19.353	9.75714	7.2987	19.3142	19.8819	13.4857	13.8071	10.5962	17.8665	11.9493	11.2495	18.1371	14.2527	13.8944	21.8031
yd8	PGSC0003DMT400093266	chr09	56713501	56713942	42.4922	67.8442	27.4105	25.3538	49.5742	48.0959	35.4975	80.2011	31.1456	60.1456	45.8548	103.088	33.4498	44.1948	25.7938	26.847
yd8	PGSC0003DMT400044318	chr09	56729011	56731624	1.88673	0	0	0.193331	0.634099	0.871518	0.175942	49.9048	8.59652	0.266963	2.90142	20.2902	4.48956	24.8261	0.745766	0.175275
yd9	PGSC0003DMT400093649	chr12	52418740	52419298	21.6925	78.4813	85.5349	59.5745	50.4593	78.4661	73.8768	25.9483	14.1448	34.3519	34.7146	28.7278	38.5971	20.3982	44.013	92.444

## Sheet: Table S5
Table S5: Tuber- and stolon-specific gene expression values underlying yield QTLs
Transcript_ID	Putative_function	QTL_ID	Tuber_Pith	Tuber_Peel	Tuber_Sprout	Tuber_Cortex	Young_Tuber	Mature_Tuber	Stolon	Stem	Shoot_Apex	Root	Stamen	Flower	Leaf	Water_Stressed_Leaf	Whole_in_vitro_Plant	Petiole
PGSC0003DMT400066980	DnaJ-like protein	yd1	-0.144424	0.0214818	1.39156	0.0764576	-1.05709	-0.970202	0.165025	-0.0846566	-1.28583	1.21297	-0.265445	0.107424	-0.985198	0.177762	0.68394	0.956224
PGSC0003DMT400026512	Phosphoribosylformylglycinamidine synthase	yd2	0.706464	0.538316	0.666569	0.769901	0.125554	-0.296358	0.39008	-0.175439	-0.00498032	0.72311	-3.0026	-1.20018	-0.231028	0.335415	0.243787	0.41139
PGSC0003DMT400026524	Armadillo/beta-catenin-like repeat-containing protein	yd2	-0.30859	0.0636933	1.29756	-0.720846	0.377316	-0.679491	0.60972	-0.229988	0.187135	1.14343	-0.317332	-0.661308	-1.34496	0.306748	0.721894	-0.444975
PGSC0003DMT400026432	6b-interacting protein 1	yd2	0.312519	-0.183942	0.956762	0.154763	-0.663636	-0.678186	0.395296	-0.572254	-0.335106	0.735018	0.87518	0.427487	-1.2999	-0.149416	0.233288	-0.207877
PGSC0003DMT400022454	Hypothetical gene of unknown function	yd3	1.77	1.11635	-0.140128	1.25205	0.908342	0.370996	0.230078	1.06397	0.207758	0.771091	-1.72303	-1.20364	-1.84408	-2.71593	-0.0464184	-0.0173992
PGSC0003DMT400022450	Leucine zipper factor-like	yd3	0.802082	0.787466	1.21059	0.455863	-0.260515	-0.551947	-0.00739477	-0.769607	-0.232654	0.779764	-0.633028	-0.698561	-1.05557	0.0611542	0.471498	-0.359141
PGSC0003DMT400078574	Non-specific lipid-transfer protein	tn1	-4.42495	-3.20546	5.34527	-1.4689	1.90647	0.0426778	3.24272	2.38874	2.31183	3.94378	-6.6261	-4.42169	1.29294	-6.6261	3.30127	2.99749
PGSC0003DMT400078544	Reticulon-like protein B14	tn1	-1.40581	-0.523225	1.44699	-0.768625	1.08933	-1.37042	2.04858	0.491195	0.138429	-0.149938	-0.4801	0.511707	0.721437	-2.16833	0.403333	0.0154429
PGSC0003DMT400078414	Ceramide kinase	tn1	0.138788	0.652562	0.58825	0.0350994	0.705067	0.110213	-0.586915	0.156192	-0.158993	0.463636	-1.10593	0.0902822	-1.05554	-0.835513	0.356376	0.446426
PGSC0003DMT400078527	GABA-specific permease	tn1	-1.2518	-1.59937	1.03138	-1.24932	2.19972	0.383095	1.73088	0.651009	1.94417	-0.984407	-2.94523	0.360637	1.38924	-1.42065	-0.384371	0.145017
PGSC0003DMT400078409	Stigma/style cell cycle inhibitor	tn1	0.996409	1.14128	1.41882	0.853163	-0.369675	0.455176	0.38476	-0.845748	-0.424924	0.823135	-1.51753	-0.47079	-0.723842	-0.309149	-0.146747	-1.26434
PGSC0003DMT400019845	Starch-granule-bound R1 protein	tw1	1.50241	1.04249	0.649042	1.62753	-0.33634	0.770583	-1.48759	-1.34692	-0.0147055	0.655909	-0.375439	-0.846187	-1.26921	0.962472	-1.21005	-0.324003
PGSC0003DMT400019848	Putative carboxyl-terminal peptidase	tw1	-2.30438	-3.1718	0.5452	-1.4466	1.64161	-3.3653	2.48863	1.34822	-1.63227	1.92394	1.36721	1.0954	1.2844	-1.89708	1.15381	0.968993
PGSC0003DMT400077403	SMC-like protein	yd5	0.331343	0.974416	0.776708	-0.245002	0.490865	0.174641	2.06865	-0.376997	0.182229	-1.32802	-2.53579	-0.0897859	-1.20072	-0.150199	0.0692359	0.858415
PGSC0003DMT400083093	Heparanase-like protein	yd6	-0.372177	-0.623264	-0.024551	-0.443218	0.675276	-0.315466	0.776993	0.467115	-0.0628228	-0.182895	-1.30266	0.0582092	0.107766	0.21536	0.691864	0.334467
PGSC0003DMT400083090	Putative uncharacterized protein	yd6	-0.102246	-0.690164	3.36122	2.21434	2.39533	1.87151	1.07882	1.68847	-0.18708	-0.161354	-1.1814	-1.12804	-5.11725	-7.67724	2.07559	1.5595
PGSC0003DMT400083077	Gibberellin-regulated protein	yd6	-3.8302	-2.35602	2.46698	-3.8302	3.70244	-3.8302	7.57037	2.03371	-1.03981	-3.8302	-3.8302	3.34033	4.87303	-3.8302	2.04008	0.350112
PGSC0003DMT400083076	MYB transcription factor	yd6	-3.65235	-1.44392	1.69603	-3.65235	1.5996	-2.39013	2.68152	2.029	-1.70047	-3.65235	0.109099	2.42277	2.06411	0.176771	2.11492	1.59773
PGSC0003DMT400083150	60S ribosomal protein L34	yd6	1.11391	0.934618	0.177683	1.23074	0.9593	1.13082	0.518964	-0.0704245	0.974078	-0.577827	-3.0552	-1.02872	-0.921217	-0.58464	-0.37356	-0.428527
PGSC0003DMT400083149	Nucleosome/chromatin assembly factor group	yd6	0.101448	0.527753	0.891266	0.440005	1.22689	0.754043	0.580074	-0.561676	0.948262	0.486377	-4.87048	-0.872177	-1.24516	0.583288	0.34711	0.662973
PGSC0003DMT400083148	TCP-domain protein	yd6	-2.25261	-3.49308	0.970304	-1.73531	2.71778	0.23005	2.53488	1.99032	-0.491047	1.58447	-4.18834	-0.43479	-0.131411	-1.18049	1.97185	1.90741
PGSC0003DMT400083137	Delta-1-pyrroline-5-carboxylate dehydrogenase 1 protein	yd6	0.679419	0.46684	0.586747	0.946464	0.715697	1.29628	-0.43555	-1.23865	0.658752	-1.04197	0.170995	0.197625	-2.21714	0.473822	-0.184974	-1.07436
PGSC0003DMT400083136	Putative uncharacterized protein	yd6	-0.305332	-0.108889	0.434071	-0.0980182	0.789497	-0.00431086	0.424687	-0.0893745	0.564074	-0.0076344	-1.13772	-0.648539	-0.190105	-0.201775	0.273366	0.306003
PGSC0003DMT400083065	Isochorismate synthase 2	yd6	-1.68727	-1.19829	-0.376868	-1.50052	-1.1897	-2.45472	2.51369	1.10396	-1.05607	-1.07122	1.17451	2.05655	1.72904	-0.364224	1.86327	0.457855
PGSC0003DMT400083041	Plasma membrane H+-ATPase	yd6	-0.0957803	0.000572096	0.00622861	-0.127879	0.785143	-0.818611	-0.229495	0.0222583	-0.119554	0.109691	-0.253705	0.562626	-0.246436	0.70107	-0.263296	-0.0328323
PGSC0003DMT400079846	Putative uncharacterized protein	tn3	0.197011	-0.225706	0.199004	0.165537	0.75919	-0.155416	-0.0365657	-0.188791	0.745553	0.143114	-1.25696	-0.50596	-0.457253	0.147088	0.21965	0.250507
PGSC0003DMT400079851	Endomembrane family protein	tn3	-1.11688	-0.813012	0.0585655	-0.974923	1.54389	-0.545311	0.346256	0.87635	0.900471	-0.696633	-0.293856	0.480285	0.0663617	-0.824465	0.111238	0.881668
PGSC0003DMT400044336	COP1-interacting protein-like protein	yd8	0.418473	0.0862041	0.947879	0.334832	0.00883853	-0.400426	0.176392	-0.107609	-0.481289	0.941865	-0.893411	-0.550505	-0.715089	-0.466544	0.52893	0.17146
PGSC0003DMT400044334	RNA recognition motif-containing protein	yd8	1.28353	0.813295	2.11156	0.973924	1.10622	0.577398	1.55652	-2.03065	0.333557	-0.258266	-3.23788	0.226374	-2.4068	0.438125	-1.26677	-0.220133
PGSC0003DMT400044333	Putative uncharacterized protein	yd8	-0.294018	0.438483	3.54213	-0.181787	-0.525074	-1.02586	-4.13706	0.888502	-1.8951	2.60841	-4.13706	-0.506394	0.368998	-1.87662	3.47819	3.25424
Values are as the average log2(fold-change) using pairwise ratios of TPM (Transcripts per million) between tissues
